# Supplementary material
Source: PubMed Central journal article supplement (PMC9645460)
Supplement: NIHMS1846630-supplement-Supplement_Development___Validation_Manuscript.pdf [file NIHMS1846630-supplement-Supplement_Development___Validation_Manuscript.pdf]

## Supplemental Material for:

Holsteen KK, Hittle M, Barad M, Nelson LM. Development and Internal Validation of a Multivariable Prediction Model for Individual Episodic Migraine Attacks Based on Daily Trigger Exposures. *Headache*. 2020 Nov;60(10):2364-2379. doi: 10.1111/head.13960. Epub 2020 Oct 6. PMID: 33022773.

## SUPPLEMENT

### Contents

|                                                                    |    |
|--------------------------------------------------------------------|----|
| Section S1 . Screening Survey .....                                | 3  |
| Section S2 . Daily Survey .....                                    | 5  |
| Section S3 . Predictor Susceptibility to Measurement Error .....   | 15 |
| Section S4 . Discrete Hazard of Migraine Events .....              | 16 |
| Section S5 . Timing of Data Collection.....                        | 19 |
| Section S6 . Distribution of Predictors. ....                      | 20 |
| Section S7 . Estimated Odds Ratios from Best Category Models ..... | 23 |
| Section S8 . Estimated Odds Ratios from Primary Model. ....        | 25 |
| Section S9 . Estimated Odds Ratios from Penalized Model.....       | 27 |

### Supplementary Figures

|                                                                               |    |
|-------------------------------------------------------------------------------|----|
| Figure S1: Discrete Hazard of Migraine Attack, 1-day Recovery Period. ....    | 17 |
| Figure S2: Discrete Hazard of Migraine Attack, 0-day Recovery Period. ....    | 18 |
| Figure S3: Timing of Data Collection and Intended Risk Estimation. ....       | 19 |
| Figure S4: Estimated Odds Ratios from the Best Category-Specific Models. .... | 24 |

### Supplementary Tables

|                                                                               |    |
|-------------------------------------------------------------------------------|----|
| Table S1: Distribution of Predictors (Overall). ....                          | 20 |
| Table S2: Distribution of Predictors (Within-Person Means). ....              | 21 |
| Table S3: Distribution of Predictors (Within-Person Standard Deviations)..... | 22 |
| Table S4: Estimated Odds Ratios from Primary Model. ....                      | 26 |
| Table S5: Estimated Odds Ratios from Penalized Model. ....                    | 28 |



## Section S1. Screening Survey

This section displays the questions administered in the RedCap Screening Survey.

### Basic Questions

Timestamp of survey start

\_\_\_\_\_

What is your date of birth?

\_\_\_\_\_  
(YYYY-MM-DD)

Age

\_\_\_\_\_  
(This is automatically calculated based on birth date.)

Over the past year, have you suffered from severe headaches?

Yes  
 No

Do you use an iPhone as your primary mobile phone?

Yes  
 No

Are you currently living in the United States?

Yes  
 No

Where did you first hear about this study?

ResearchMatch  
 Stanford - Email  
 Stanford - Flyer  
 Facebook group  
 Twitter  
 Nextdoor  
 Other

Basic Criteria Eligible?

\_\_\_\_\_  
(Calculates whether basic eligibility criteria are met.)

### Headache Symptoms

During the last 3 months, did you have the following with your headaches:

You felt nauseated or sick to your stomach?

Yes  
 No

Light bothered you (a lot more than when you didn't have headaches)?

Yes  
 No

Your headaches limited your ability to work, study, or do what you needed to do for at least 1 day?

Yes  
 No

Headache Symptoms Eligible?

\_\_\_\_\_  
(Calculates whether headache symptoms criteria are met.)

---

**Headache Frequency**

---

For how long have you experienced severe headaches?

- Less than one year  
 One year or more

---

During the last 3 months, did your headaches change noticeably (in frequency or severity)?

- Yes, my headaches changed noticeably during the last 3 months.  
 No, my headaches were consistent for the last 3 months.

---

During the last 3 months, did you have 1 or more headaches per month?

- Yes, I had 1 or more headaches per month  
 No, I had less than 1 headache per month

---

During the last 3 months, about how many headaches did you have per month?

\_\_\_\_\_ (headaches per month)

---

Sometimes a headache may last longer than one day. During the last 3 months, how many days per month did you have a headache?

\_\_\_\_\_ (days per month)

---

Headache Frequency Eligible?

\_\_\_\_\_ (Calculates whether headache frequency criteria are met.)

---

**iPhone Questions**

---

Are you willing to complete a 2-4 minute survey every evening for 90 days (3 months), within an app downloaded onto your iPhone?

- Yes  
 No

---

Which model number is your iPhone?

- iPhone 3G, 3GS, 4, or 4S  
 iPhone 5, 5C, 5S, or SE  
 iPhone 6, 6 Plus, 6S, or 6S Plus  
 iPhone 7 or 7 Plus  
 iPhone 8 or 8 Plus  
 iPhone X

---

Are you willing to update your iPhone to the latest version of iOS?

- Yes  
 No

---

Are you comfortable reading and writing on your iPhone in English?

- Yes  
 No

---

iPhone Eligible?

\_\_\_\_\_ (Calculates whether iPhone-related eligibility criteria are met.)

---

Finally Eligible?

\_\_\_\_\_ (Calculates final decision on eligibility.)

## Section S2. Daily Survey

The purpose of this section is to display the questions administered in the daily in-app survey.

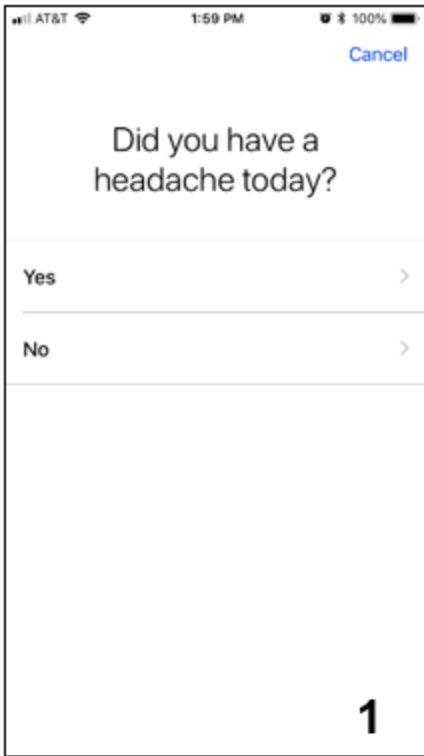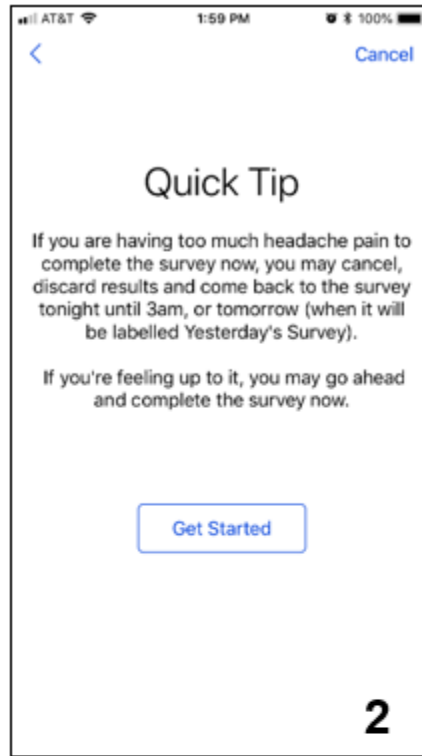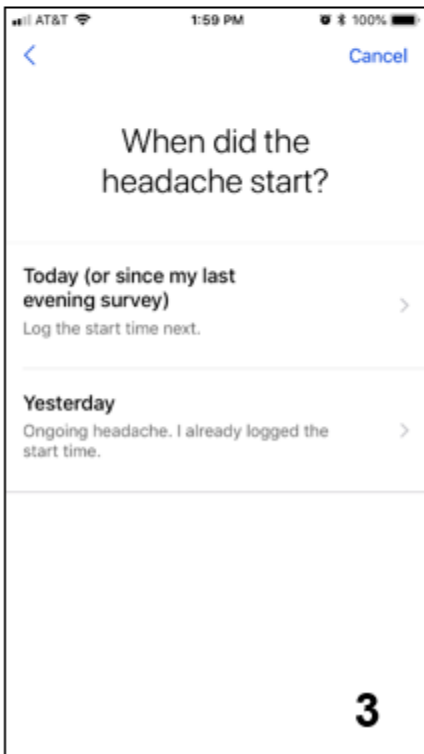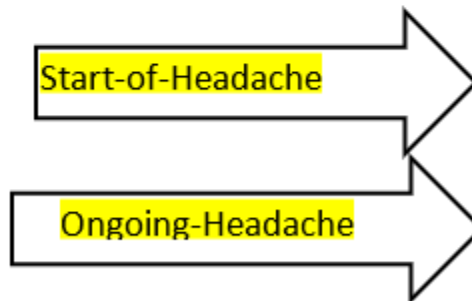

## Start-of-Headache

What time did the headache start?

|            |    |       |
|------------|----|-------|
| Tue Jul 4  | 4  | 07    |
| Wed Jul 5  | 5  | 58    |
| Thu Jul 6  | 6  | 59    |
| Today      | 7  | 00 AM |
| Sat Jul 8  | 8  | 01 PM |
| Sun Jul 9  | 9  | 02    |
| Mon Jul 10 | 10 | 03    |

Next 4

Did you experience visual or other sensory disturbances in the 1 hour before headache onset?  
e.g. blind spots, zigzag patterns, flashing lights, numbness, tingling

Yes >

No >

5

Did you take any medications to treat this headache today?  
Select all that apply.

No medications

Over-the-counter analgesics or NSAIDs  
e.g. Aspirin, Tylenol, Advil, Aleve

Combination analgesics  
e.g. Anacin, Excedrin, Midrin, Fiorinal

Triptans  
e.g. Avert, Relpax, Frova, Amerge, Maxalt, Imitrex, Zomig

Combination analgesics  
e.g. Anacin, Excedrin, Midrin, Fiorinal

Triptans  
e.g. Imitrex, Relpax, Frova, Amerge, Maxalt, Zomig

Ergotamines  
e.g. DHE 45 Migranal, Ergomar, Cafergot

Alternative Therapy  
e.g. herbal supplement, acupuncture, massage

Other type of medication

Next 6

## Ongoing Headache questions

Did the headache finish yet?

Yes >

No >

I'm not sure >

7

End-of-Headache

Trigger Factors

## End-of Headache questions

1:58 PM 100%

< Cancel

What time did the headache end?

If you're not sure, please just give your best guess.  
If you went to sleep during the headache and woke up relieved, please report the time you woke up.

|            |    |       |
|------------|----|-------|
| Mon Aug 27 | 10 | 00    |
| Tue Aug 28 | 11 | 57    |
| Wed Aug 29 | 12 | 58 AM |
| Today      | 1  | 59 PM |
| Fri Aug 31 | 2  | 00    |
| Sat Sep 1  | 3  | 01    |
| Sun Sep 2  | 4  | 02    |

Next 8

1:58 PM 100%

< Cancel

Where did it hurt today?

One side of head >

Both sides of head >

9

1:58 PM 100%

< Cancel

Rate your peak pain during the headache today.

Mild >

Moderate >

Severe >

10

9:25 AM 94%

< Cancel

What kind of pain was it?

Pulsating or throbbing >

Another kind of pain  
e.g. stabbing, dull, or pressing >

11

9:25 AM 94%

< Cancel

Did you experience any additional symptoms during the headache?  
Select all that apply.

Nausea or vomiting >

Sensitivity to light >

Sensitivity to noise >

None of the above >

Next 12

1:01 AM 93%

< Cancel

Was the pain aggravated by routine physical activity?  
e.g. walking or climbing stairs

Yes >

No >

13

## Trigger Factors

What kind of day was today?

Work / School Day

Weekend / Day off / Half Day

Holiday / Vacation

14

## Sleep Questions

What time did you turn the lights out to try to go to sleep last night?

9 53 PM

Next 15

About how long did it take you to fall asleep last night?

Less than 15 minutes

16-30 minutes

31-60 minutes

More than 60 minutes

Next 16

What time did you wake up for the day today?

5 53 AM

Next 17

Please rate your sleep quality last night.

Very Good

Good

Fair

Poor

Very Poor

18



1:45 App Store Cancel

Did you wake up at all during the night?

Any time between your reported bedtime and wake time, not counting your final awakening

Yes >

No >

**19**

1:45 App Store Cancel

In total, how long did these awakenings last?

55  
0

0 hours 5 min

1 10  
2 15  
3 20

Next **20**

2:47 App Store Cancel

Did you take any naps today?

Yes ✓

No

Next **21**

2:47 App Store Cancel

In total, how long did your nap(s) last?

55  
0

0 hours 5 min

1 10  
2 15  
3 20

Next **22**

**Stress Questions**

AT&T 12:15 PM 93% Cancel

Overall, how stressful was today?

5

0 ————— 10  
Not at all Extremely

Next **23**

## Dietary Triggers

Carrier 2:00 PM 100%

How many cups of caffeinated beverages did you have today?

Include coffee, tea (black or green), soda (Pepsi, Coke, Mountain Dew) and energy drinks (Red Bull, Monster).

0

0 cups 10 cups

Next **24**

Carrier 11:57 AM

At which times did you drink caffeinated beverages today?

Include coffee, tea (black or green), soda (Pepsi, Coke, Mountain Dew) and energy drinks (Red Bull, Monster). Please select the hours closest to the times at which you drank.

12am

1am

2am

3am

4am **25**

Carrier 2:00 PM 100%

How many drinks of red wine did you have today?

1 drink = 5 oz. glass

1

0 drinks 10 drinks

Next **26**

Carrier 11:57 AM

At which times did you drink red wine today?

Please select the hours closest to the times at which you drank.

12am

1am

2am

3am

4am

5am **27**

Carrier 2:00 PM 100%

How many drinks of other alcoholic beverages did you have today?

1 drink = 5oz. glass of wine, 12oz. can of beer or 1 shot of liquor

0

0 drinks 10 drinks

Next **28**

Carrier 11:58 AM

At which times did you drink other alcoholic beverages today?

Please select the hours closest to the times at which you drank.

12am

1am

2am

3am

4am

5am **29**

Other questions

AT&T 3:45 PM 100%

Cancel

Any changes to your headache preventive medications today?

Do not include medications that you already reported taking to treat a headache today.

Missed a preventive med

Took an extra preventive med

Made a long-term change to my preventive meds

No changes today

Next **30**

AT&T 3:45 PM 100%

Cancel

Long-term Change #1

Please enter the name and new dosage of any medication that you added, changed, or stopped taking. If you stopped taking it, please enter 0 for the dose amount and doses per day.

Medication Name

Dosage

Units e.g. ml, mg, pills, puffs

Doses per Day per day

Other notes

DO YOU HAVE ANOTHER CHANGE TO REPORT? **31**

AT&T 9:27 AM 94%

Cancel

Did you have menstrual bleeding today?

Yes >

No >

**32**

AT&T 6:07 PM 70%

Cancel

How likely do you think are you to experience a headache in the next 24 hours?

Almost certain (>95% chance) >

Very likely (75-94% chance) >

Fairly likely (50-74% chance) >

Quite unlikely (25-49% chance) >

Very unlikely (<25% chance) >

**33**

**Premonitory Symptoms**

12:05 PM 78%

< Cancel

Overall today, how tired did you feel?

None >

Mild >

Moderate >

Severe >

**34**

12:05 PM 78%

< Cancel

Overall today, how nauseous did you feel?

None >

Mild >

Moderate >

Severe >

**35**

12:05 PM 78%

< Cancel

Overall today, how much neck pain/stiffness did you feel?

None >

Mild >

Moderate >

Severe >

**36**

12:05 PM 78%

< Cancel

Overall today, how sensitive to light did you feel?

None >

Mild >

Moderate >

Severe >

**37**

12:05 PM 78%

< Cancel

Overall today, how sensitive to loud noises did you feel?

None >

Mild >

Moderate >

Severe >

**38**

12:05 PM 78%

< Cancel

Overall today, how sensitive to odors did you feel?

None >

Mild >

Moderate >

Severe >

**39**

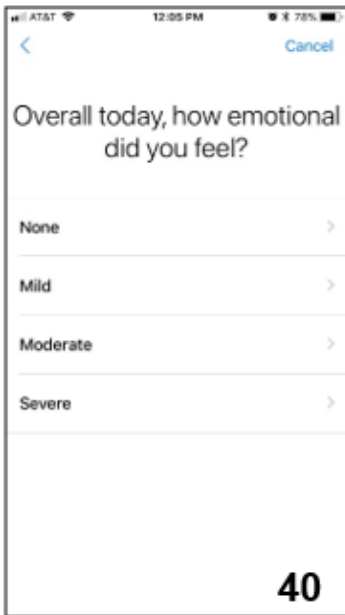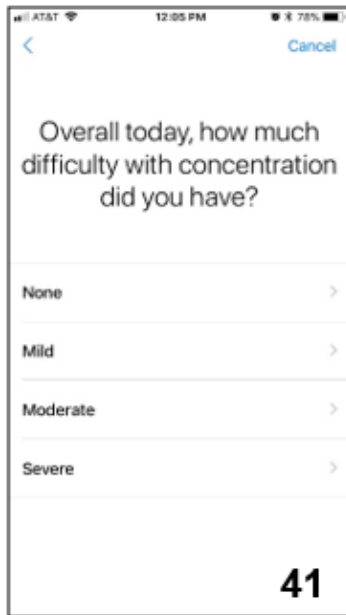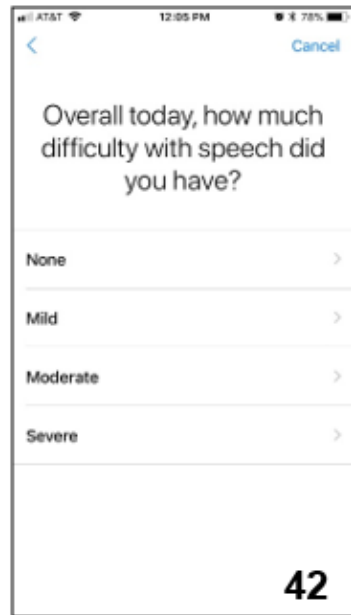

**Local weather (if not sharing location with app ALWAYS)**

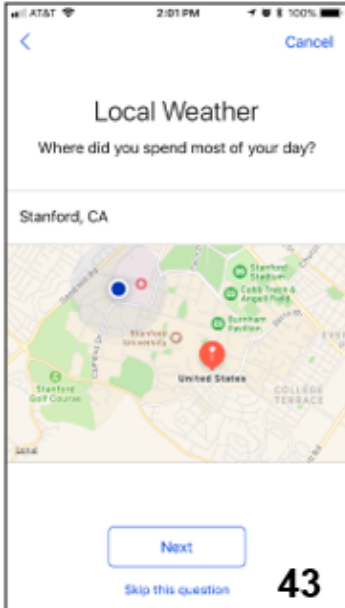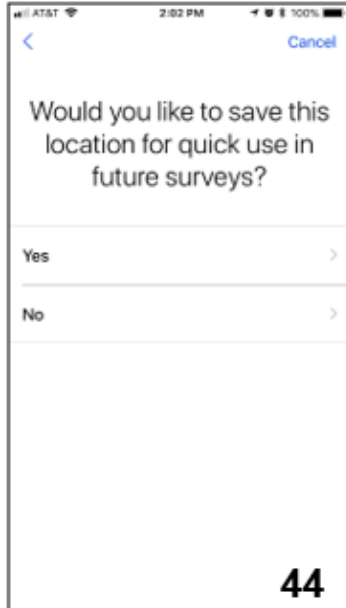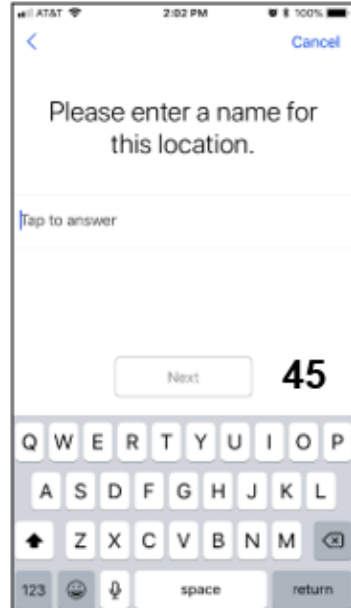

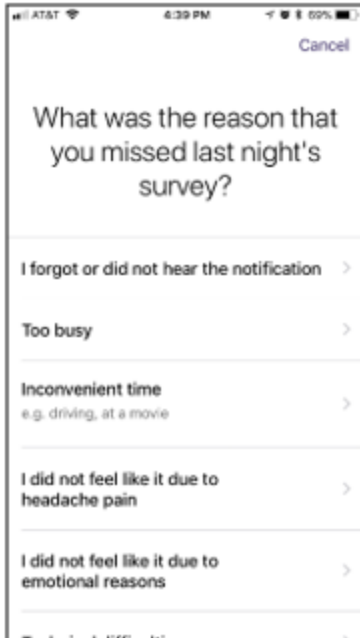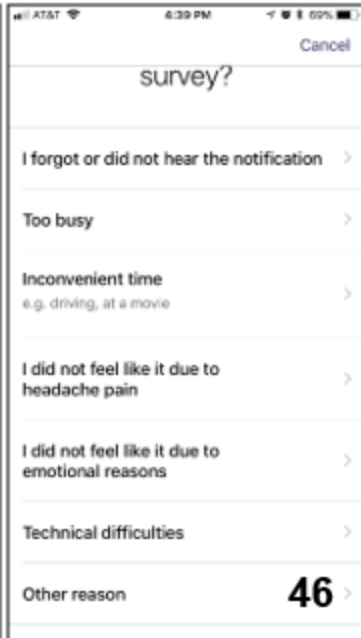

(If last night's survey missed)

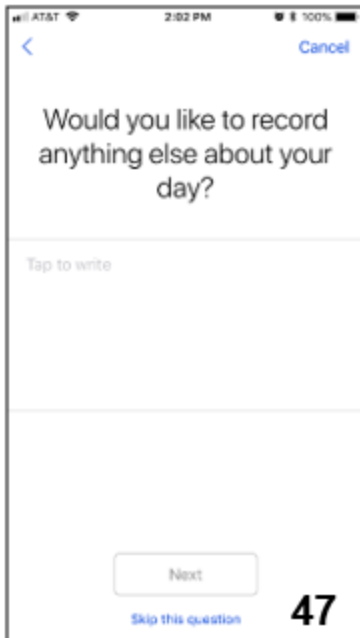

### **Section S3. Predictor Susceptibility to Measurement Error**

The purpose of this supplemental section is to acknowledge the degree of measurement error that may have been present in the predictors that were almost exclusively collected through a very basic iPhone survey, and that these errors may have reduced the prediction model accuracy.

**Sleep:** High susceptibility to measurement error. Participants were asked to report last evening's bedtime, wake time, sleep latency, and nighttime awake duration on the next evening's survey. These might be difficult to remember with accuracy, even immediately upon waking.

**Stress:** Moderate to high susceptibility to measurement error. Participants provided a subjective one-dimensional summary every evening which may have been subject to recall bias over the day and/or systematic bias due to recording at the same time every day. Participants may not have accurately perceived their own level of stress.

**Consumption:** Medium susceptibility to measurement error. Participants reported caffeine and alcohol consumption in units of cups or drinks. Participants may have biased recall about the number of cups or drinks they consumed, and different beverages have different amounts of caffeine and alcohol which may contribute additional error.

**Weather:** Low susceptibility to measurement error. We expect a low risk of error for weather data which was passively collected from a separate API. The source of error here is participant travel, at which time they would not have actually been exposed to their home weather conditions.

**Menstruation:** Low susceptibility to measurement error. We expect a low likelihood of error in reporting of menstruation, but some participants appeared to have irregular or unpredictable cycles which may cloud the interpretation of the derived indicator variable for days -2 to 2.

**Workday vs. Non-Workday:** Low susceptibility to measurement error.

In future work, measuring sleep, stress, and consumption in ways that are less susceptible to measurement error may improve predictions.

## Section S4. Discrete Hazard of Migraine Events

The purpose of this supplementary section is to further describe the observed discrete hazard of migraine and explain why we elected not to include predictors based on lagged migraines or time since the last migraine.

Episodic migraine may be a cyclical disorder, in which the threshold for trigger sensitivity gradually declines over an interictal period.<sup>57,58</sup> Under this model, the risk of new migraine onset varies depending on the time since the last migraine. When a patient is exposed to one or more trigger factors during a susceptible period, that can bring him/her over the “migraine threshold” and initiate an attack.<sup>4,15,59,60</sup> The baseline hazard of migraine may depend upon the time since the last migraine. If so, then it would be essential to incorporate a time-varying baseline hazard into the prediction model.<sup>61</sup>

Using our empirical data, we examined how the discrete hazard of migraine changed over the time since recovery from previous migraine. We first grouped participants by decile of migraine risk (number of new migraines divided by number of at-risk days). Within each decile we calculated the discrete hazard of new migraine (the number of new migraines occurring at a given time since last migraine, divided by the total number of at-risk days with that same time since last migraine). We did this for the migraines identified using a one-day recovery period (the primary method in this paper) as well as no recovery period. The results are plotted in Error! Reference source not found. and Error! Reference source not found.. The results showed a roughly constant hazard (not counting the last couple of days in each stratum, which have very few exposures). This suggests that the time since recovery from the last migraine does not give much information about the risk of the next migraine. For this reason, we elected not to include predictors based on lagged migraines or time since the last migraine.



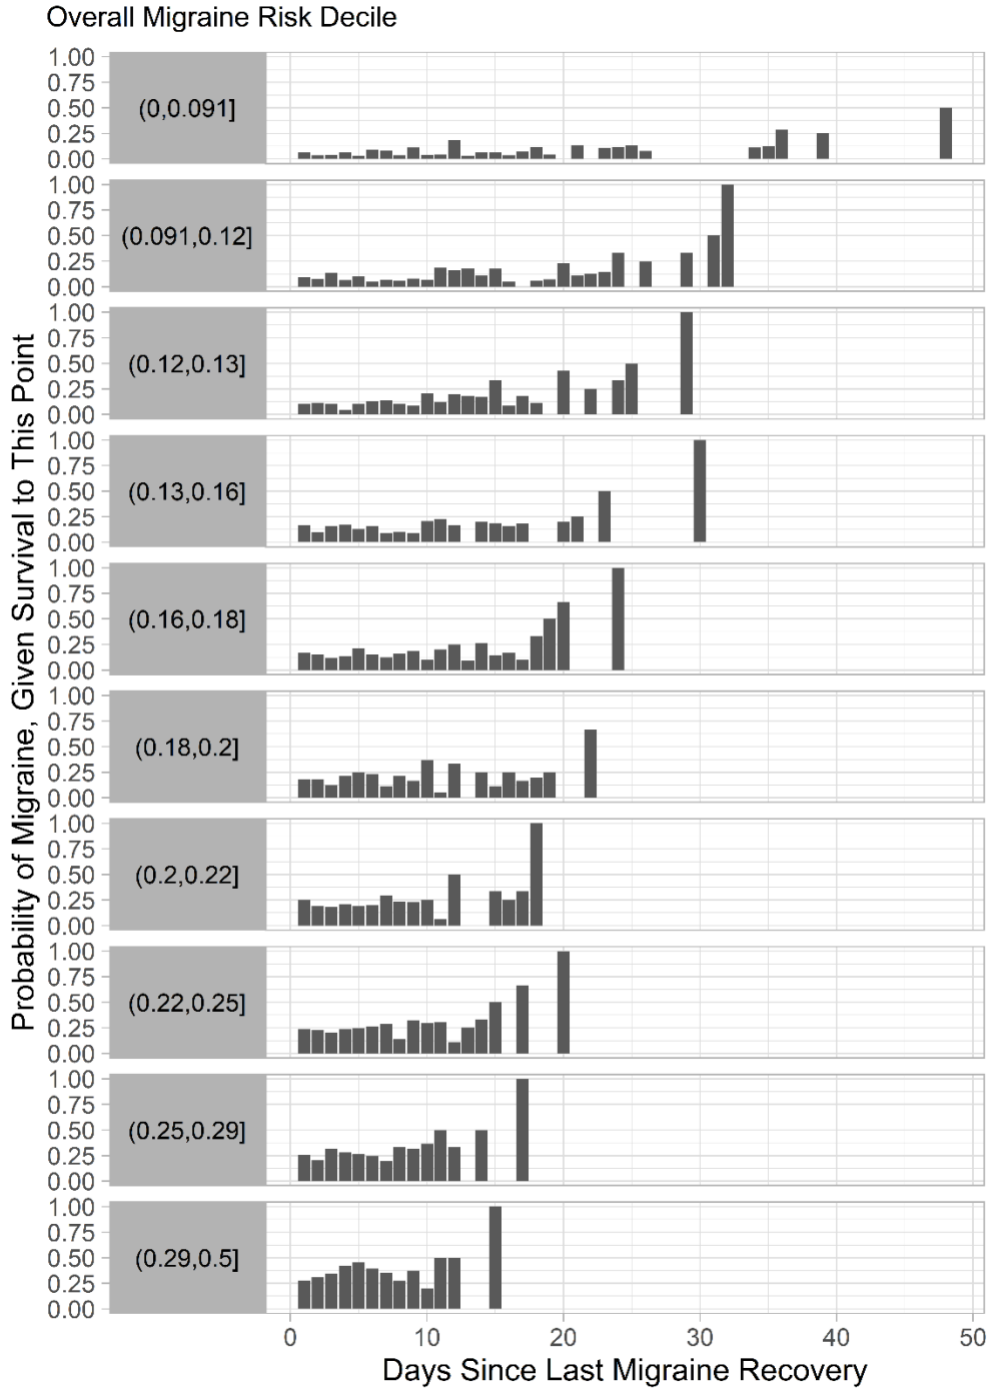

**Figure S1: Discrete Hazard of Migraine Attack, 1-day Recovery Period.**

Discrete hazards were calculated based on the number of days since recovery from the last migraine, where recovery was defined as the completion of a migraine-free day. The plot is stratified by decile of participant-specific migraine risk observed in the study (lowest at the top).

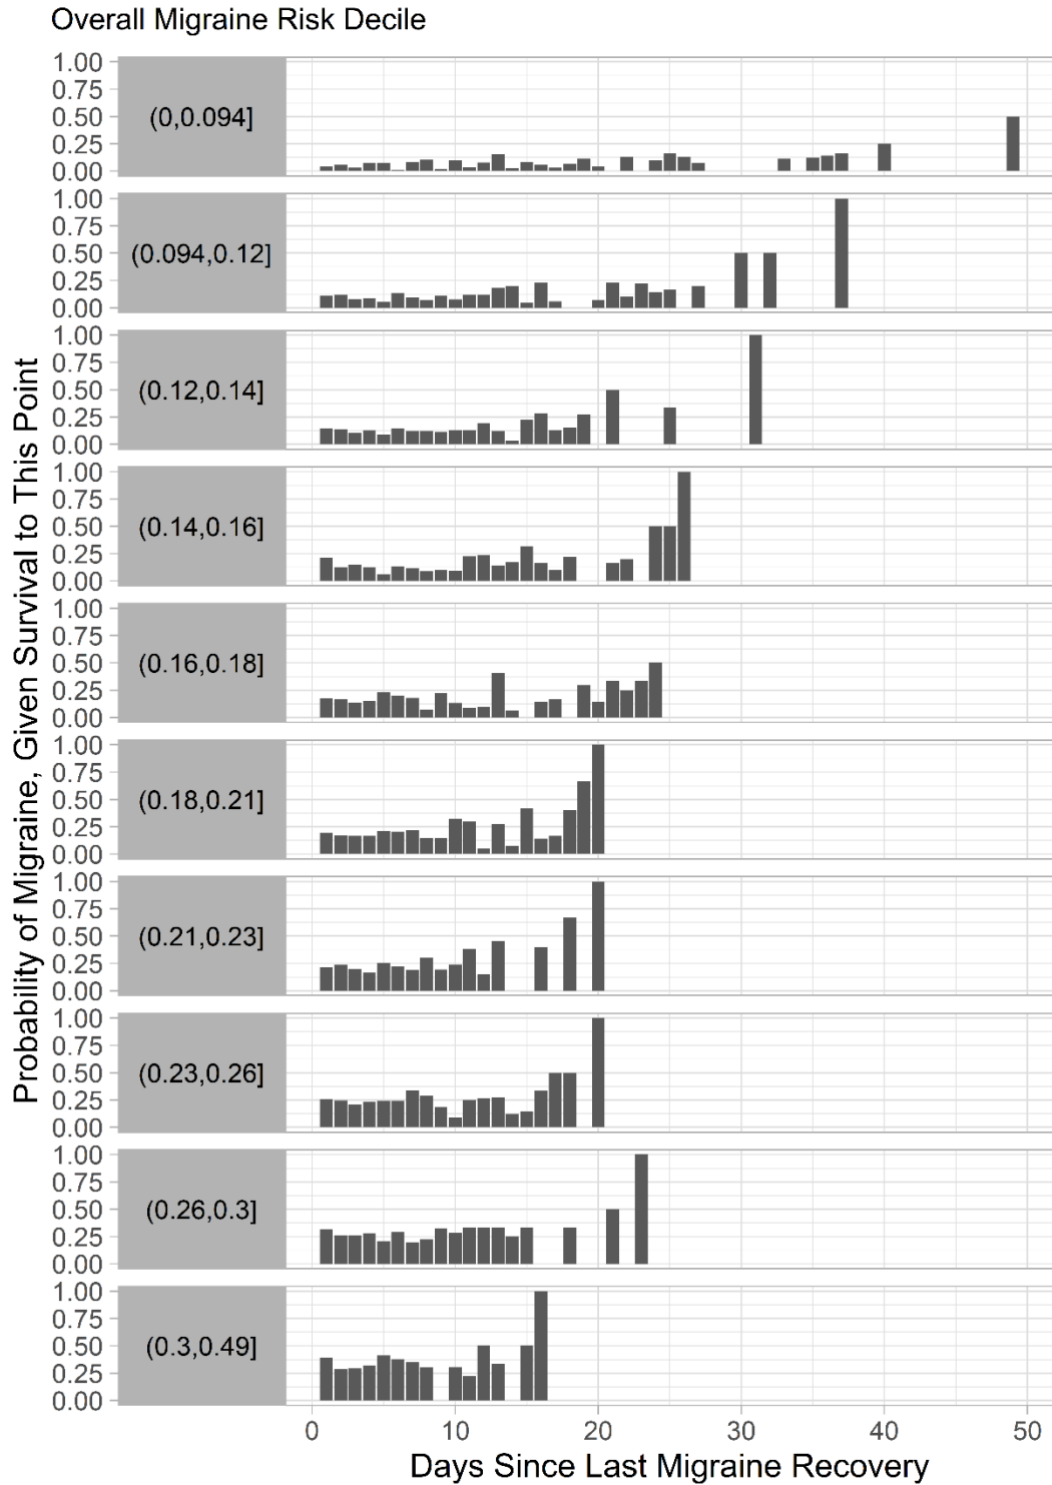

**Figure S2: Discrete Hazard of Migraine Attack, 0-day Recovery Period.**

Discrete hazards were calculated based on the number of days since recovery from the last migraine, where recovery was defined as the completion of the day on which a migraine ended (with no extra migraine-free day). The plot is stratified by decile of participant-specific migraine risk observed in the study (lowest at the top).

## Section S5. Timing of Data Collection

This section summarizes the timing of data collection used in the current predictive model, with respect to the intended timing of risk estimation (**Figure S3**). Participants were expected to complete their evening surveys before 3 am, at which point a new 24-hour risk period for the migraine event would begin. In practice, a daily migraine prediction app would take into account the data available up until 3am, apply the predictive model, and output a probability for the coming day. Such predictions would not have access to any data collected after 3am on the target day. All day-level factors except for menstruation and workday status are collected before 3am on the target day. Menstruation, workday status, and within-person means of all factors rely on same-day and/or future data to construct the predictors.

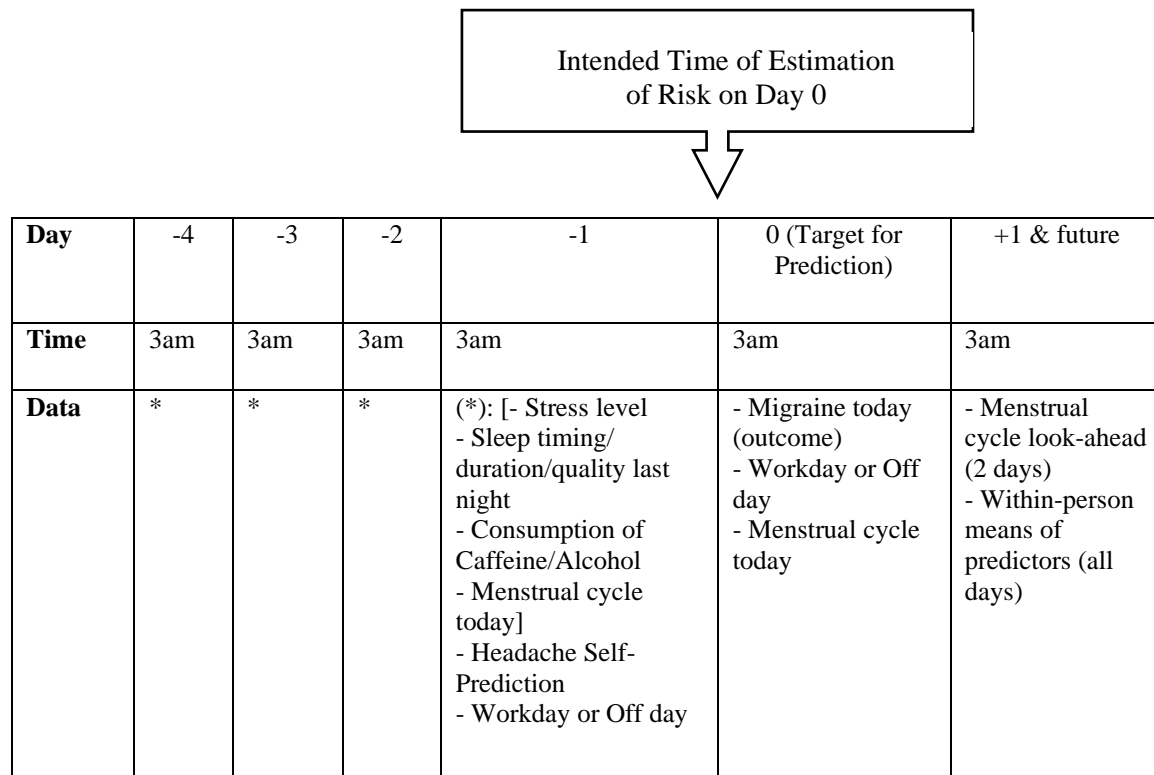

**Figure S3: Timing of Data Collection and Intended Risk Estimation.**

## Section S6. Distribution of Predictors.

This section gives the distribution of predictors over all person-days (**Table S1**), for within-person means (**Table S2**), and within-person standard deviations (**Table S3**). These descriptive statistics help to interpret the current findings and to estimate the expected predictor variation for future studies.

**Table S1: Distribution of Predictors (Overall).**

| Predictor                     | Units        | Percentile of Overall Distribution |        |        |        |        |        |        |      |
|-------------------------------|--------------|------------------------------------|--------|--------|--------|--------|--------|--------|------|
|                               |              | 5th                                | 10th   | 25th   | 50th   | 75th   | 90th   | 95th   | SD   |
| Bedtime, Diff from 12am       | hours        | -3.0                               | -2.5   | -2.0   | -1.0   | 0.0    | 1.0    | 2.0    | 1.6  |
| Sleep Duration                | hours        | 4.7                                | 5.5    | 6.6    | 7.5    | 8.4    | 9.4    | 10.0   | 1.6  |
| Sleep Quality (PC1)           | unitless     | -1.6                               | -0.9   | -0.8   | -0.2   | 0.5    | 1.6    | 2.5    | 1.3  |
| Change in Sleep Hours         | hours        | -3.0                               | -2.2   | -1.0   | 0.0    | 0.9    | 2.1    | 3.0    | 1.9  |
| Change in Bed Time            | hours        | -2.0                               | -1.3   | -0.5   | 0.0    | 0.5    | 1.3    | 2.0    | 1.3  |
| Change in Sleep Quality (PC1) | unitless     | -2.1                               | -1.3   | -0.6   | 0.0    | 0.7    | 1.5    | 2.3    | 1.5  |
| Stress Rating                 | 0-10 scale   | 0.0                                | 1.0    | 2.0    | 4.0    | 5.0    | 7.0    | 8.0    | 2.3  |
| Change in Stress Rating       | -10 to 10    | -3.0                               | -2.0   | -1.0   | 0.0    | 1.0    | 3.0    | 4.0    | 2.1  |
| Temp. Max                     | degrees F    | 27.8                               | 32.7   | 42.6   | 55.5   | 67.2   | 77.4   | 82.0   | 17.0 |
| Pressure Min                  | millibars    | 1000.4                             | 1003.6 | 1008.8 | 1014.2 | 1019.2 | 1023.7 | 1026.2 | 7.9  |
| Wind Gust Speed               | miles per hr | 5.7                                | 6.8    | 9.2    | 13.5   | 19.2   | 24.9   | 28.7   | 7.2  |
| Precipitation/Humidity (PC1)  | unitless     | -1.5                               | -1.3   | -0.9   | -0.6   | 0.7    | 2.0    | 3.0    | 1.6  |
| Change in Temp. Max           | degrees F    | -14.0                              | -9.9   | -4.3   | 0.4    | 4.7    | 9.7    | 12.9   | 8.0  |
| Change in Pressure Min        | millibars    | -12.2                              | -8.5   | -4.1   | -0.1   | 3.8    | 9.0    | 12.7   | 7.4  |
| Change in Wind Gust Speed     | miles per hr | -12.4                              | -9.0   | -4.2   | 0.0    | 4.1    | 9.4    | 13.1   | 7.6  |
| Caffeinated Bev               | cups         | 0.0                                | 0.0    | 0.0    | 1.0    | 2.0    | 3.0    | 4.0    | 1.4  |
| Change in Caffeinated Bev     | cups         | -1.3                               | -1.0   | 0.0    | 0.0    | 0.0    | 1.0    | 1.0    | 0.9  |
| Alcohol                       | drinks       | 0.0                                | 0.0    | 0.0    | 0.0    | 0.0    | 2.0    | 2.0    | 1.0  |
| Change in Alcohol             | drinks       | -2.0                               | -1.0   | 0.0    | 0.0    | 0.0    | 1.0    | 2.0    | 1.0  |
| Headache Self-Prediction      | 0-4 scale    | 0.0                                | 0.0    | 0.0    | 1.0    | 2.0    | 2.0    | 2.0    | 0.8  |

**Table S2: Distribution of Predictors (Within-Person Means).**

| Predictor                     | Units        | Percentile of Within-Person Means |        |        |        |        |        |        |      |
|-------------------------------|--------------|-----------------------------------|--------|--------|--------|--------|--------|--------|------|
|                               |              | 5th                               | 10th   | 25th   | 50th   | 75th   | 90th   | 95th   | SD   |
| Bedtime, Diff from 12am       | hours        | -2.4                              | -2.2   | -1.6   | -1.1   | -0.5   | 0.4    | 0.8    | 1.1  |
| Sleep Duration                | hours        | 6.1                               | 6.5    | 6.9    | 7.5    | 8.1    | 8.4    | 8.9    | 0.9  |
| Sleep Quality (PC1)           | unitless     | -0.8                              | -0.6   | -0.4   | -0.1   | 0.4    | 0.9    | 1.5    | 0.7  |
| Change in Sleep Hours         | hours        | -0.2                              | -0.2   | -0.1   | 0.0    | 0.0    | 0.1    | 0.2    | 0.1  |
| Change in Bed Time            | hours        | -0.1                              | -0.1   | 0.0    | 0.0    | 0.0    | 0.1    | 0.1    | 0.1  |
| Change in Sleep Quality (PC1) | unitless     | -0.1                              | -0.1   | 0.0    | 0.0    | 0.1    | 0.1    | 0.2    | 0.1  |
| Stress Rating                 | 0-10 scale   | 1.3                               | 1.8    | 2.7    | 4.2    | 5.1    | 5.7    | 6.2    | 1.5  |
| Change in Stress Rating       | -10 to 10    | -0.2                              | -0.1   | 0.0    | 0.1    | 0.2    | 0.3    | 0.4    | 0.2  |
| Temp. Max                     | degrees F    | 32.3                              | 37.7   | 44.5   | 56.4   | 64.6   | 70.6   | 77.7   | 13.4 |
| Pressure Min                  | millibars    | 1010.2                            | 1011.1 | 1012.1 | 1014.2 | 1015.5 | 1016.5 | 1016.9 | 2.4  |
| Wind Gust Speed               | miles per hr | 10.1                              | 10.9   | 12.3   | 14.3   | 17.0   | 19.9   | 22.1   | 3.7  |
| Precipitation/Humidity (PC1)  | unitless     | -0.8                              | -0.6   | -0.3   | 0.0    | 0.3    | 0.6    | 0.7    | 0.5  |
| Change in Temp. Max           | degrees F    | -0.8                              | -0.6   | -0.3   | 0.1    | 0.5    | 0.8    | 1.0    | 0.6  |
| Change in Pressure Min        | millibars    | -0.8                              | -0.6   | -0.3   | 0.0    | 0.3    | 0.7    | 1.0    | 0.6  |
| Change in Wind Gust Speed     | miles per hr | -0.7                              | -0.4   | -0.2   | 0.1    | 0.3    | 0.6    | 0.8    | 0.5  |
| Caffeinated Bev               | cups         | 0.0                               | 0.2    | 0.6    | 1.5    | 2.1    | 3.1    | 4.0    | 1.3  |
| Change in Caffeinated Bev     | cups         | -0.1                              | -0.1   | 0.0    | 0.0    | 0.0    | 0.1    | 0.1    | 0.1  |
| Alcohol                       | drinks       | 0.0                               | 0.0    | 0.0    | 0.1    | 0.5    | 1.1    | 1.5    | 0.6  |
| Change in Alcohol             | drinks       | -0.1                              | -0.1   | 0.0    | 0.0    | 0.0    | 0.1    | 0.1    | 0.1  |
| Headache Self-Prediction      | 0-4 scale    | 0.2                               | 0.3    | 0.6    | 1.1    | 1.4    | 1.8    | 2.0    | 0.6  |

**Table S3: Distribution of Predictors (Within-Person Standard Deviations).**

| Predictor                     | Units        | Percentile of Within-Person Standard Deviations |      |      |      |      |      |      |     |
|-------------------------------|--------------|-------------------------------------------------|------|------|------|------|------|------|-----|
|                               |              | 5th                                             | 10th | 25th | 50th | 75th | 90th | 95th | SD  |
| Bedtime, Diff from 12am       | hours        | 0.5                                             | 0.6  | 0.7  | 0.9  | 1.2  | 1.4  | 1.5  | 0.5 |
| Sleep Duration                | hours        | 0.8                                             | 0.9  | 1.0  | 1.3  | 1.6  | 2.0  | 2.3  | 0.5 |
| Sleep Quality (PC1)           | unitless     | 0.5                                             | 0.6  | 0.7  | 1.0  | 1.2  | 1.6  | 1.9  | 0.4 |
| Change in Sleep Hours         | hours        | 1.0                                             | 1.1  | 1.3  | 1.7  | 2.1  | 2.6  | 3.1  | 0.6 |
| Change in Bed Time            | hours        | 0.6                                             | 0.7  | 0.9  | 1.1  | 1.5  | 1.8  | 2.0  | 0.5 |
| Change in Sleep Quality (PC1) | unitless     | 0.7                                             | 0.8  | 1.0  | 1.3  | 1.6  | 2.0  | 2.5  | 0.6 |
| Stress Rating                 | 0-10 scale   | 0.7                                             | 1.0  | 1.3  | 1.7  | 2.1  | 2.6  | 2.9  | 0.7 |
| Change in Stress Rating       | -10 to 10    | 0.9                                             | 1.1  | 1.5  | 2.0  | 2.4  | 3.0  | 3.2  | 0.7 |
| Temp. Max                     | degrees F    | 5.2                                             | 7.0  | 8.4  | 10.3 | 12.0 | 13.3 | 14.1 | 2.7 |
| Pressure Min                  | millibars    | 4.0                                             | 4.7  | 6.3  | 7.5  | 8.9  | 9.7  | 9.8  | 1.9 |
| Wind Gust Speed               | miles per hr | 3.9                                             | 4.5  | 5.4  | 6.3  | 7.0  | 7.7  | 8.4  | 1.4 |
| Precipitation/Humidity (PC1)  | unitless     | 0.6                                             | 0.8  | 1.0  | 1.3  | 1.7  | 2.0  | 2.3  | 0.5 |
| Change in Temp. Max           | degrees F    | 3.5                                             | 4.2  | 6.5  | 8.4  | 9.4  | 10.1 | 10.3 | 2.1 |
| Change in Pressure Min        | millibars    | 3.2                                             | 4.0  | 5.6  | 7.6  | 8.5  | 9.9  | 10.3 | 2.2 |
| Change in Wind Gust Speed     | miles per hr | 4.6                                             | 5.1  | 6.2  | 7.3  | 8.7  | 9.6  | 10.4 | 1.8 |
| Caffeinated Bev               | cups         | 0.1                                             | 0.3  | 0.5  | 0.6  | 0.8  | 1.1  | 1.2  | 0.3 |
| Change in Caffeinated Bev     | cups         | 0.2                                             | 0.5  | 0.7  | 0.8  | 1.0  | 1.4  | 1.5  | 0.4 |
| Alcohol                       | drinks       | 0.0                                             | 0.0  | 0.1  | 0.5  | 0.9  | 1.3  | 1.6  | 0.5 |
| Change in Alcohol             | drinks       | 0.0                                             | 0.0  | 0.2  | 0.7  | 1.2  | 1.6  | 2.0  | 0.6 |
| Headache Self-Prediction      | 0-4 scale    | 0.3                                             | 0.3  | 0.5  | 0.6  | 0.7  | 0.9  | 0.9  | 0.2 |

## **Section S7. Estimated Odds Ratios from Best Category Models**

This section shows the estimated odds ratios of the best category-specific models that were selected based on the AIC (**Figure S4**). Each model was also adjusted for the three baseline features: self-reported headaches per month, headache days per month, and presence of a change in headache frequency or severity within the past 3 months. The predictors from these best category models were included in the primary predictive model.

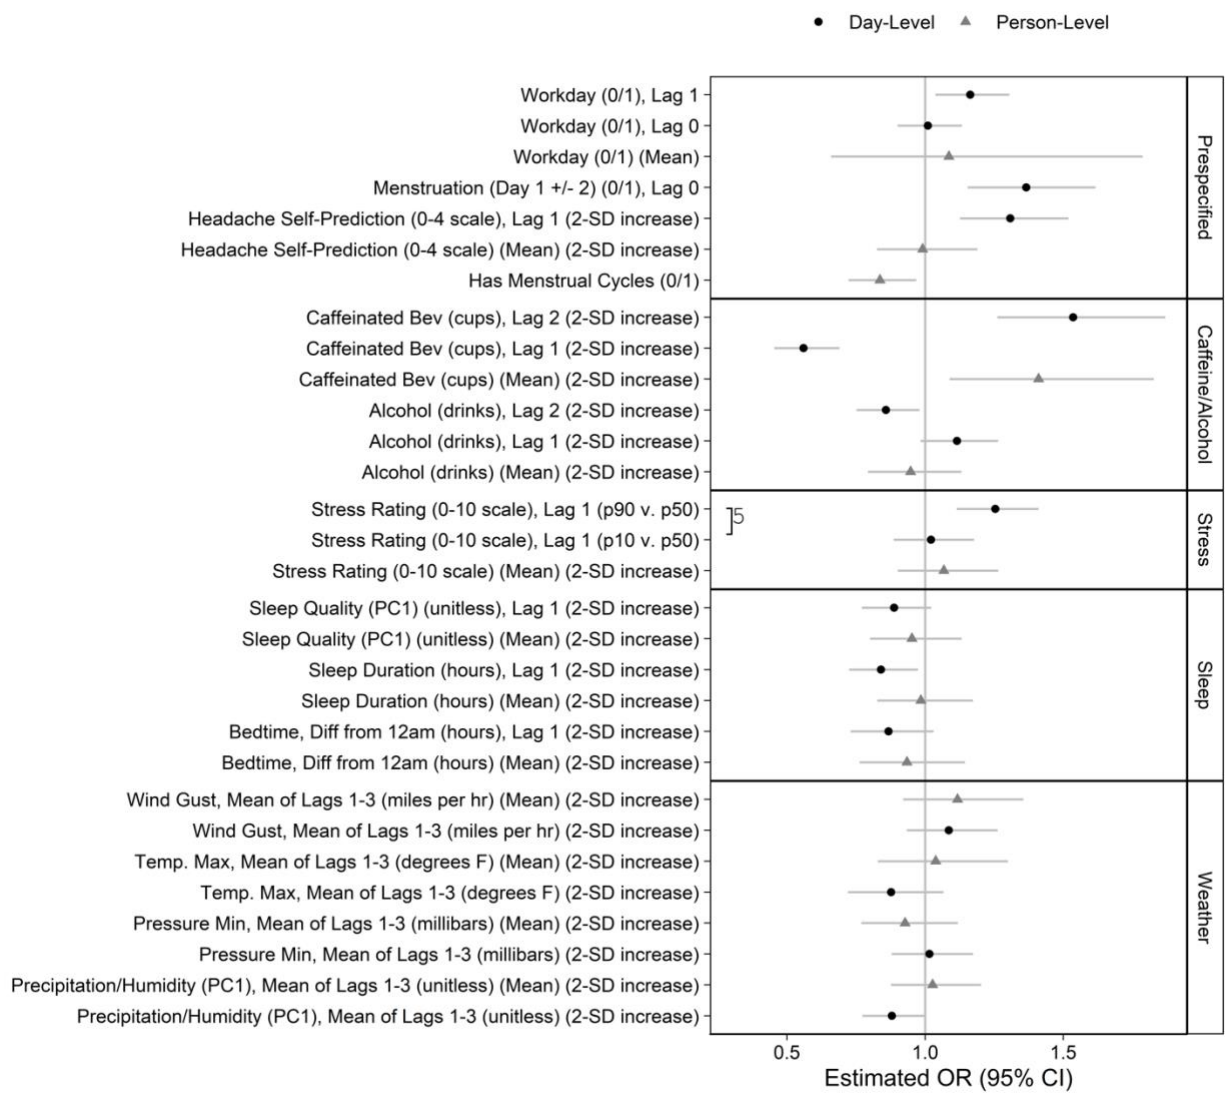

**Figure S4: Estimated Odds Ratios from the Best Category-Specific Models.**

Separate multivariable logistic regression models were estimated for each category of predictors (indicated by separate boxes on the plot). Each model was also adjusted for the three baseline features: self-reported headaches per month, headache days per month, and presence of a change in headache frequency or severity within the past 3 months. Lag 0 denotes the day for which migraine risk is predicted; lag 1 denotes the day before, and lag 2 denotes two days prior. Predictors modeled by 3-knot natural cubic splines were represented in the model by two separate linear terms and are shown in this plot by two separate estimates to summarize the nonlinear relationship: odds ratio for the 90th vs. 50th, and 10th vs. 50th percentiles of the overall distribution of the predictor. On this plot, these pairs of terms are always connected by a “]” with an integer denoting the number of imputations (of 5) in which the pair of linear terms was jointly statistically significant. For the predictors modeled linearly, odds ratios compare the risk associated with a 2-SD difference in the (continuous) predictor value, or with a change from 0 to 1 in a dichotomous predictor.



## **Section S8. Estimated Odds Ratios from Primary Model.**

The purpose of this section is to publish the full estimated odds ratios and 95% confidence intervals from the primary predictive model (**Table S4**), to supplement the estimates plotted in Error! Reference source not found.. As discussed in the methods section, this model was composed of the best models from each category selected based on AIC, and in total it included 34 predictors including the intercept.

**Table S4: Estimated Odds Ratios from Primary Model.**

| Category         | Variable                                                                         | Person-Level? | Estimated OR (95% CI) |
|------------------|----------------------------------------------------------------------------------|---------------|-----------------------|
| Baseline         | Headaches per Month (Logit) (logit ha/mo/30) (2-SD increase)                     | 1             | 1.29 (1.10, 1.53)     |
| Baseline         | Headache Days per Month (Logit) (logit d/mo/30) (2-SD increase)                  | 1             | 1.24 (1.06, 1.45)     |
| Baseline         | Headaches Changed in Past 3 Months (0/1)                                         | 1             | 0.77 (0.62, 0.96)     |
| Caffeine/Alcohol | Caffeinated Bev (cups) (Mean) (2-SD increase)                                    | 1             | 1.28 (0.98, 1.67)     |
| Caffeine/Alcohol | Caffeinated Bev (cups), Lag 2 (2-SD increase)                                    | 0             | 1.53 (1.26, 1.87)     |
| Caffeine/Alcohol | Caffeinated Bev (cups), Lag 1 (2-SD increase)                                    | 0             | 0.54 (0.44, 0.67)     |
| Caffeine/Alcohol | Alcohol (drinks) (Mean) (2-SD increase)                                          | 1             | 0.95 (0.80, 1.14)     |
| Caffeine/Alcohol | Alcohol (drinks), Lag 2 (2-SD increase)                                          | 0             | 0.90 (0.79, 1.03)     |
| Caffeine/Alcohol | Alcohol (drinks), Lag 1 (2-SD increase)                                          | 0             | 1.13 (0.99, 1.29)     |
| Prespecified     | Headache Self-Prediction (0-4 scale) (Mean) (2-SD increase)                      | 1             | 1.00 (0.83, 1.20)     |
| Prespecified     | Headache Self-Prediction (0-4 scale), Lag 1 (2-SD increase)                      | 0             | 1.27 (1.09, 1.48)     |
| Prespecified     | Has Menstrual Cycles (0/1)                                                       | 1             | 0.84 (0.73, 0.97)     |
| Prespecified     | Menstruation (Day 1 +/- 2) (0/1), Lag 0                                          | 0             | 1.38 (1.16, 1.63)     |
| Prespecified     | Workday (0/1) (Mean)                                                             | 1             | 0.93 (0.56, 1.54)     |
| Prespecified     | Workday (0/1), Lag 1                                                             | 0             | 1.12 (0.98, 1.27)     |
| Prespecified     | Workday (0/1), Lag 0                                                             | 0             | 1.01 (0.90, 1.14)     |
| Sleep            | Bedtime, Diff from 12am (hours) (Mean) (2-SD increase)                           | 1             | 0.92 (0.74, 1.13)     |
| Sleep            | Bedtime, Diff from 12am (hours), Lag 1 (2-SD increase)                           | 0             | 0.93 (0.77, 1.12)     |
| Sleep            | Sleep Quality (PC1) (unitless) (Mean) (2-SD increase)                            | 1             | 0.95 (0.80, 1.13)     |
| Sleep            | Sleep Quality (PC1) (unitless), Lag 1 (2-SD increase)                            | 0             | 0.88 (0.76, 1.02)     |
| Sleep            | Sleep Duration (hours) (Mean) (2-SD increase)                                    | 1             | 1.07 (0.89, 1.28)     |
| Sleep            | Sleep Duration (hours), Lag 1 (2-SD increase)                                    | 0             | 0.90 (0.77, 1.06)     |
| Stress           | Stress Rating (0-10 scale) (Mean) (2-SD increase)                                | 1             | 1.15 (0.97, 1.37)     |
| Stress           | Stress Rating (0-10 scale), Lag 1 (p10 v. p50)                                   | 0             | 1.10 (0.94, 1.28)     |
| Stress           | Stress Rating (0-10 scale), Lag 1 (p90 v. p50)                                   | 0             | 1.21 (1.07, 1.37)     |
| Weather          | Wind Gust, Mean of Lags 1-3 (miles per hr) (Mean) (2-SD increase)                | 1             | 1.15 (0.95, 1.39)     |
| Weather          | Wind Gust, Mean of Lags 1-3 (miles per hr) (2-SD increase)                       | 0             | 1.07 (0.92, 1.24)     |
| Weather          | Precipitation/Humidity (PC1), Mean of Lags 1-3 (unitless) (Mean) (2-SD increase) | 1             | 1.01 (0.87, 1.18)     |
| Weather          | Precipitation/Humidity (PC1), Mean of Lags 1-3 (unitless) (2-SD increase)        | 0             | 0.89 (0.78, 1.02)     |
| Weather          | Temp. Max, Mean of Lags 1-3 (degrees F) (Mean) (2-SD increase)                   | 1             | 1.00 (0.80, 1.25)     |
| Weather          | Temp. Max, Mean of Lags 1-3 (degrees F) (2-SD increase)                          | 0             | 0.87 (0.71, 1.06)     |
| Weather          | Pressure Min, Mean of Lags 1-3 (millibars) (Mean) (2-SD increase)                | 1             | 0.99 (0.82, 1.18)     |
| Weather          | Pressure Min, Mean of Lags 1-3 (millibars) (2-SD increase)                       | 0             | 1.01 (0.88, 1.17)     |
|                  | Intercept                                                                        |               | 0.19 (0.15, 0.26)     |

Predictors were measured at the day level (varying across persons and across days within persons) or the person level (varying across persons, but constant across days within persons). Lag 0 denotes the day for which migraine risk is predicted; lag 1 denotes the day before, and lag 2 denotes two days prior. Predictors modeled by 3-knot natural cubic splines were represented in the model by two separate linear terms and are shown in this plot by two separate estimates to summarize the nonlinear relationship: odds ratios for the 90th vs. 50th, and 50th vs. 10th percentiles of the overall distribution of the predictor. These estimates and confidence intervals are plotted in Error! Reference source not found..

## **Section S9. Estimated Odds Ratios from Penalized Model.**

The purpose of this section is to display the results of the grouped-lasso penalized logistic regression model (**Table S5**). This table gives the full list of candidate predictors included in the grouped-lasso procedure, ranked by their absolute mean estimated log-OR. The means are taken over all five imputations, whether or not the predictor was selected for a nonzero effect. The number of imputations in which each predictor was assigned a positive, negative, or zero coefficient are shown in the corresponding columns. The grouped lasso procedure does not produce standard errors for the estimates, so this table does not include confidence intervals.

**Table S5: Estimated Odds Ratios from Penalized Model.**

| Category         | Variable                                                        | Person Level? | N Positive | N Zero | N Negative | Estimated OR |
|------------------|-----------------------------------------------------------------|---------------|------------|--------|------------|--------------|
|                  | Intercept                                                       |               | 0          | 0      | 5          | 0.19         |
| Prespecified     | Menstruation (Day 1 +/- 2) (0/1), Lag 0                         | 0             | 5          | 0      | 0          | 1.28         |
| Baseline         | Headaches per Month (Logit) (logit ha/mo/30) (2-SD increase)    | 1             | 5          | 0      | 0          | 1.25         |
| Prespecified     | Headache Self-Prediction (0-4 scale), Lag 1 (2-SD increase)     | 0             | 5          | 0      | 0          | 1.22         |
| Caffeine/Alcohol | Change in Caffeinated Bev (cups), Lag 1 (p10 v. p50)            | 0             | 5          | 0      | 0          | 1.21         |
| Baseline         | Headache Days per Month (Logit) (logit d/mo/30) (2-SD increase) | 1             | 5          | 0      | 0          | 1.17         |
| Sleep            | Change in Sleep Quality (PC1) (unitless) (Mean) (2-SD increase) | 1             | 0          | 0      | 5          | 0.86         |
| Weather          | Wind Gust Speed (miles per hr) (Mean) (2-SD increase)           | 1             | 5          | 0      | 0          | 1.16         |
| Baseline         | Headaches Changed in Past 3 Months (0/1)                        | 1             | 0          | 0      | 5          | 0.87         |
| Stress           | Stress Rating (0-10 scale), Lag 1 (p90 v. p50)                  | 0             | 5          | 0      | 0          | 1.15         |
| Prespecified     | Has Menstrual Cycles (0/1)                                      | 1             | 0          | 0      | 5          | 0.89         |
| Prespecified     | Workday (0/1), Lag 1                                            | 0             | 5          | 0      | 0          | 1.10         |
| Caffeine/Alcohol | Change in Caffeinated Bev (cups), Lag 1 (p90 v. p50)            | 0             | 0          | 0      | 5          | 0.92         |
| Caffeine/Alcohol | Change in Alcohol (drinks), Lag 1 (2-SD increase)               | 0             | 5          | 0      | 0          | 1.08         |
| Sleep            | Bedtime, Diff from 12am (hours) (Mean) (2-SD increase)          | 1             | 0          | 0      | 5          | 0.93         |
| Caffeine/Alcohol | Caffeinated Bev (cups) (Mean) (2-SD increase)                   | 1             | 5          | 0      | 0          | 1.06         |
| Stress           | Stress Rating (0-10 scale) (Mean) (2-SD increase)               | 1             | 5          | 0      | 0          | 1.06         |
| Weather          | Temp. Max (degrees F), Lag 2 (2-SD increase)                    | 0             | 0          | 0      | 5          | 0.94         |
| Weather          | Precipitation/Humidity (PC1) (unitless), Lag 2 (2-SD increase)  | 0             | 0          | 0      | 5          | 0.94         |
| Sleep            | Bedtime, Diff from 12am (hours), Lag 2 (2-SD increase)          | 0             | 0          | 0      | 5          | 0.96         |
| Stress           | Stress Rating (0-10 scale), Lag 1 (p10 v. p50)                  | 0             | 5          | 0      | 0          | 1.04         |
| Weather          | Change in Pressure Min (millibars), Lag 1 (p90 v. p50)          | 0             | 5          | 0      | 0          | 1.04         |
| Weather          | Wind Gust Speed (miles per hr), Lag 3 (2-SD increase)           | 0             | 5          | 0      | 0          | 1.03         |
| Sleep            | Change in Sleep Quality (PC1) (unitless), Lag 1 (p90 v. p50)    | 0             | 0          | 0      | 5          | 0.98         |
| Caffeine/Alcohol | Alcohol (drinks), Lag 3 (2-SD increase)                         | 0             | 0          | 0      | 5          | 0.98         |
| Stress           | Change in Stress Rating (from -10 to 10), Lag 1 (p90 v. p50)    | 0             | 5          | 0      | 0          | 1.02         |
| Sleep            | Sleep Quality (PC1) (unitless), Lag 1 (p90 v. p50)              | 0             | 0          | 0      | 5          | 0.98         |
| Sleep            | Change in Sleep Quality (PC1) (unitless), Lag 1 (p10 v. p50)    | 0             | 0          | 0      | 5          | 0.99         |
| Sleep            | Sleep Quality (PC1) (unitless) (Mean) (2-SD increase)           | 1             | 0          | 0      | 5          | 0.99         |
| Weather          | Pressure Min (millibars), Lag 1 (p90 v. p50)                    | 0             | 5          | 0      | 0          | 1.01         |
| Weather          | Change in Temp. Max (degrees F), Lag 1 (p90 v. p50)             | 0             | 0          | 0      | 5          | 0.99         |
| Sleep            | Sleep Quality (PC1) (unitless), Lag 1 (p10 v. p50)              | 0             | 0          | 0      | 5          | 0.99         |
| Weather          | Change in Wind Gust Speed (miles per hr) (Mean) (2-SD increase) | 1             | 0          | 0      | 5          | 0.99         |
| Weather          | Precipitation/Humidity (PC1) (unitless), Lag 1 (p90 v. p50)     | 0             | 0          | 0      | 5          | 0.99         |
| Weather          | Change in Temp. Max (degrees F), Lag 1 (p10 v. p50)             | 0             | 0          | 0      | 5          | 0.99         |

|                  |                                                                 |   |   |   |   |      |
|------------------|-----------------------------------------------------------------|---|---|---|---|------|
| Weather          | Change in Pressure Min (millibars), Lag 1 (p10 v. p50)          | 0 | 1 | 0 | 4 | 1.00 |
| Weather          | Precipitation/Humidity (PC1) (unitless), Lag 1 (p10 v. p50)     | 0 | 5 | 0 | 0 | 1.00 |
| Stress           | Change in Stress Rating (from -10 to 10), Lag 1 (p10 v. p50)    | 0 | 5 | 0 | 0 | 1.00 |
| Weather          | Pressure Min (millibars), Lag 1 (p10 v. p50)                    | 0 | 0 | 0 | 5 | 1.00 |
| Caffeine/Alcohol | Alcohol (drinks), Lag 2 (2-SD increase)                         | 0 | 0 | 4 | 1 | 1.00 |
| Weather          | Change in Wind Gust Speed (miles per hr), Lag 1 (p10 v. p50)    | 0 | 2 | 3 | 0 | 1.00 |
| Stress           | Change in Stress Rating (from -10 to 10) (Mean) (2-SD increase) | 1 | 0 | 4 | 1 | 1.00 |
| Weather          | Wind Gust Speed (miles per hr), Lag 2 (2-SD increase)           | 0 | 1 | 4 | 0 | 1.00 |
| Weather          | Change in Wind Gust Speed (miles per hr), Lag 1 (p90 v. p50)    | 0 | 2 | 3 | 0 | 1.00 |
| Caffeine/Alcohol | Caffeinated Bev (cups), Lag 1 (p10 v. p50)                      | 0 | 1 | 4 | 0 | 1.00 |
| Sleep            | Sleep Quality (PC1) (unitless), Lag 3 (2-SD increase)           | 0 | 0 | 4 | 1 | 1.00 |
| Caffeine/Alcohol | Caffeinated Bev (cups), Lag 1 (p90 v. p50)                      | 0 | 1 | 4 | 0 | 1.00 |
| Caffeine/Alcohol | Change in Caffeinated Bev (cups) (Mean) (2-SD increase)         | 1 | 0 | 5 | 0 | 1.00 |
| Caffeine/Alcohol | Change in Caffeinated Bev (cups), Lag 2 (2-SD increase)         | 0 | 0 | 5 | 0 | 1.00 |
| Caffeine/Alcohol | Caffeinated Bev (cups), Lag 3 (2-SD increase)                   | 0 | 0 | 5 | 0 | 1.00 |
| Caffeine/Alcohol | Caffeinated Bev (cups), Lag 2 (2-SD increase)                   | 0 | 0 | 5 | 0 | 1.00 |
| Caffeine/Alcohol | Change in Alcohol (drinks) (Mean) (2-SD increase)               | 1 | 0 | 5 | 0 | 1.00 |
| Caffeine/Alcohol | Change in Alcohol (drinks), Lag 2 (2-SD increase)               | 0 | 0 | 5 | 0 | 1.00 |
| Caffeine/Alcohol | Alcohol (drinks) (Mean) (2-SD increase)                         | 1 | 0 | 5 | 0 | 1.00 |
| Caffeine/Alcohol | Alcohol (drinks), Lag 1 (2-SD increase)                         | 0 | 0 | 5 | 0 | 1.00 |
| Prespecified     | Headache Self-Prediction (0-4 scale) (Mean) (2-SD increase)     | 1 | 0 | 5 | 0 | 1.00 |
| Prespecified     | Workday (0/1) (Mean)                                            | 1 | 0 | 5 | 0 | 1.00 |
| Prespecified     | Workday (0/1), Lag 2                                            | 0 | 0 | 5 | 0 | 1.00 |
| Prespecified     | Workday (0/1), Lag 0                                            | 0 | 0 | 5 | 0 | 1.00 |
| Sleep            | Change in Bed Time (hours) (Mean) (2-SD increase)               | 1 | 0 | 5 | 0 | 1.00 |
| Sleep            | Change in Bed Time (hours), Lag 2 (2-SD increase)               | 0 | 0 | 5 | 0 | 1.00 |
| Sleep            | Change in Bed Time (hours), Lag 1 (p10 v. p50)                  | 0 | 0 | 5 | 0 | 1.00 |
| Sleep            | Change in Bed Time (hours), Lag 1 (p90 v. p50)                  | 0 | 0 | 5 | 0 | 1.00 |
| Sleep            | Bedtime, Diff from 12am (hours), Lag 3 (2-SD increase)          | 0 | 0 | 5 | 0 | 1.00 |
| Sleep            | Bedtime, Diff from 12am (hours), Lag 1 (p10 v. p50)             | 0 | 0 | 5 | 0 | 1.00 |
| Sleep            | Bedtime, Diff from 12am (hours), Lag 1 (p90 v. p50)             | 0 | 0 | 5 | 0 | 1.00 |
| Sleep            | Change in Sleep Quality (PC1) (unitless), Lag 2 (2-SD increase) | 0 | 0 | 5 | 0 | 1.00 |
| Sleep            | Sleep Quality (PC1) (unitless), Lag 2 (2-SD increase)           | 0 | 0 | 5 | 0 | 1.00 |
| Sleep            | Change in Sleep Hours (hours) (Mean) (2-SD increase)            | 1 | 0 | 5 | 0 | 1.00 |
| Sleep            | Change in Sleep Hours (hours), Lag 2 (2-SD increase)            | 0 | 0 | 5 | 0 | 1.00 |
| Sleep            | Change in Sleep Hours (hours), Lag 1 (p10 v. p50)               | 0 | 0 | 5 | 0 | 1.00 |
| Sleep            | Change in Sleep Hours (hours), Lag 1 (p90 v. p50)               | 0 | 0 | 5 | 0 | 1.00 |
| Sleep            | Sleep Duration (hours) (Mean) (2-SD increase)                   | 1 | 0 | 5 | 0 | 1.00 |
| Sleep            | Sleep Duration (hours), Lag 3 (2-SD increase)                   | 0 | 0 | 5 | 0 | 1.00 |
| Sleep            | Sleep Duration (hours), Lag 2 (2-SD increase)                   | 0 | 0 | 5 | 0 | 1.00 |

|                  |                                                                 |   |   |   |   |      |
|------------------|-----------------------------------------------------------------|---|---|---|---|------|
| Sleep            | Sleep Duration (hours), Lag 1 (p10 v. p50)                      | 0 | 0 | 5 | 0 | 1.00 |
| Sleep            | Sleep Duration (hours), Lag 1 (p90 v. p50)                      | 0 | 0 | 5 | 0 | 1.00 |
| Stress           | Change in Stress Rating (from -10 to 10), Lag 2 (2-SD increase) | 0 | 0 | 5 | 0 | 1.00 |
| Stress           | Stress Rating (0-10 scale), Lag 3 (2-SD increase)               | 0 | 0 | 5 | 0 | 1.00 |
| Stress           | Stress Rating (0-10 scale), Lag 2 (2-SD increase)               | 0 | 0 | 5 | 0 | 1.00 |
| Weather          | Change in Wind Gust Speed (miles per hr), Lag 2 (2-SD increase) | 0 | 0 | 5 | 0 | 1.00 |
| Weather          | Wind Gust Speed (miles per hr), Lag 1 (p10 v. p50)              | 0 | 0 | 5 | 0 | 1.00 |
| Weather          | Wind Gust Speed (miles per hr), Lag 1 (p90 v. p50)              | 0 | 0 | 5 | 0 | 1.00 |
| Weather          | Precipitation/Humidity (PC1) (unitless) (Mean) (2-SD increase)  | 1 | 0 | 5 | 0 | 1.00 |
| Weather          | Precipitation/Humidity (PC1) (unitless), Lag 3 (2-SD increase)  | 0 | 0 | 5 | 0 | 1.00 |
| Weather          | Change in Temp. Max (degrees F) (Mean) (2-SD increase)          | 1 | 0 | 5 | 0 | 1.00 |
| Weather          | Change in Temp. Max (degrees F), Lag 2 (2-SD increase)          | 0 | 0 | 5 | 0 | 1.00 |
| Weather          | Temp. Max (degrees F) (Mean) (2-SD increase)                    | 1 | 0 | 5 | 0 | 1.00 |
| Weather          | Temp. Max (degrees F), Lag 3 (2-SD increase)                    | 0 | 0 | 5 | 0 | 1.00 |
| Weather          | Temp. Max (degrees F), Lag 1 (p10 v. p50)                       | 0 | 0 | 5 | 0 | 1.00 |
| Weather          | Temp. Max (degrees F), Lag 1 (p90 v. p50)                       | 0 | 0 | 5 | 0 | 1.00 |
| Weather          | Change in Pressure Min (millibars) (Mean) (2-SD increase)       | 1 | 0 | 5 | 0 | 1.00 |
| Weather          | Change in Pressure Min (millibars), Lag 2 (2-SD increase)       | 0 | 0 | 5 | 0 | 1.00 |
| Weather          | Pressure Min (millibars) (Mean) (2-SD increase)                 | 1 | 0 | 5 | 0 | 1.00 |
| Weather          | Pressure Min (millibars), Lag 3 (2-SD increase)                 | 0 | 0 | 5 | 0 | 1.00 |
| Weather          | Pressure Min (millibars), Lag 2 (2-SD increase)                 | 0 | 0 | 5 | 0 | 1.00 |
| Prespecified     | Menstruation (Day 1 +/- 2) (0/1), Lag 0                         | 0 | 5 | 0 | 0 | 1.28 |
| Baseline         | Headaches per Month (Logit) (logit ha/mo/30) (2-SD increase)    | 1 | 5 | 0 | 0 | 1.25 |
| Prespecified     | Headache Self-Prediction (0-4 scale), Lag 1 (2-SD increase)     | 0 | 5 | 0 | 0 | 1.22 |
| Caffeine/Alcohol | Change in Caffeinated Bev (cups), Lag 1 (p10 v. p50)            | 0 | 5 | 0 | 0 | 1.21 |
| Baseline         | Headache Days per Month (Logit) (logit d/mo/30) (2-SD increase) | 1 | 5 | 0 | 0 | 1.17 |

The estimated ORs were calculated by exponentiating the mean estimated coefficient over all of the imputations including zero and non-zero estimates. The number of imputations in which each predictor was assigned a positive, negative, or zero coefficient are shown in the corresponding columns. Lag 0 denotes the day for which migraine risk is predicted; lag 1 denotes the day before, and lag 2 denotes two days prior. Predictors modeled by 3-knot natural cubic splines were represented in the model by two separate linear terms and are shown in this plot by two separate estimates to summarize the nonlinear relationship: odds ratios for the 90th vs. 50th, and 10th vs. 50th percentiles of the overall distribution of the predictor.
